# Supplementary material for: Positionspapier der Berlin-Brandenburgischen Chirurgischen Gesellschaft – zur Zukunft der chirurgischen Weiterbildung
Source: Springer Nature journal article supplement (doi:10.1007/s00104-024-02071-4), 2024-04-24

## **Anhang 1 Teilnehmende Neuhardenberger Gespräche**

| <b>Vorname</b> | <b>Nachname</b> |
|----------------|-----------------|
| Ulrich         | Adam            |
| Georg          | Bauer           |
| Christoph      | Benckert        |
| Mike           | Bereuter        |
| Katharina      | Beyer           |
| Peter          | Bobbert         |
| Joachim        | Böttger         |
| Yao            | Chen            |
| Lope           | Estévez Schwarz |
| Stefan         | Farke           |
| Ullrich        | Fleck           |
| Marek          | Frakowiak       |
| Georg          | Fritzsch        |
| Klaus          | Gellert         |
| Hannelore      | Heidemann       |
| Michael        | Heise           |
| Matthias       | Hesse           |
| Ercan          | Kertmen         |
| Yüksel         | König           |
| Ernst          | Kraas           |
| Colin M.       | Krüger          |
| Rainer         | Kube            |
| Stefan         | Kürbis          |
| Stefan         | Lenz            |
| Martin         | Loss            |
| Frank          | Marusch         |
| Mario          | Müller          |
| Arnd           | Müller          |
| Carolin        | Oeder           |
| Gero           | Puhl            |
| Thomas         | Rost            |
| Markus         | Scheibel        |
| Roland         | Scherer         |
| Moritz         | Schmelzle       |
| Thomas         | Steinmüller     |
| Ulrich         | Stöckle         |
| Sophie         | Strozyk         |
| Henryk         | Thielemann      |
| Heinz-Peter    | Vetter          |
| Arndt          | von Kirchbach   |
| Sascha         | Weiß            |

## **Anhang 2 – Programm Neuhardenberger Gespräche**

Berliner Chirurgische Gesellschaft  
Vereinigung der Chirurgen  
Berlins und Brandenburgs

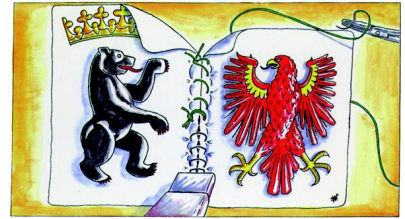

## Programm - Neuhardenberger Gespräche

Herzlich Willkommen bei den Neuhardenberger Gesprächen!

Neben der Frage, wie chirurgische Weiterbildung im ökonomischen Spannungsfeld möglich ist und erfolgen kann, drängt sich heutzutage zusätzlich die Frage des aktuellen Zeitgeistes und des Mindsets der jungen Kolleginnen und Kollegen auf. Die Etablierung von Weiterbildungskooperationen, moderne Weiterbildungskonzepte aber auch Nachwuchsförderung und Mitarbeiterbindung vor dem Hintergrund des demographischen Wandels sind aktuelle Themen der modernen Chirurgie.

Das Programm beinhaltet mehrere Impulsvorträge mit entsprechender Zeit für angeregte und offene Diskussionen. Schloss Neuhardenberg soll abseits des klinischen Alltages eine entspannte Atmosphäre bieten, um dringende Themen im kleinen Kreis intensiv zu diskutieren, die verschiedenen Perspektiven und Problematiken der einzelnen Krankenhäuser zu beleuchten und gemeinsam Lösungsstrategien zu erarbeiten, um die Zukunft unseres Faches Chirurgie weiterhin attraktiv zu gestalten.

Im Namen der Berliner Chirurgischen Gesellschaft möchten wir Sie herzlich begrüßen,

Ihr

Univ.-Prof. Dr. med. J. Pratschke

Kontaktdaten:

*Prof. Dr. med. J. Pratschke (johann.pratschke@charite.de)*

*PD Dr. med. F. Krenzien – Tagungssekretär (felix.krenzien@charite.de)*

*PD Dr. med. E. Dobrindt – Tagungssekretärin (eva-maria.dobrindt@charite.de)*

*Buchung der Zimmer unter: 033476 600-0, Stichwort „BCG-Neuhardenberger Gespräche“ bis zum 31.02.2023*

*(Übernachungskosten sind selbst zu tragen)*

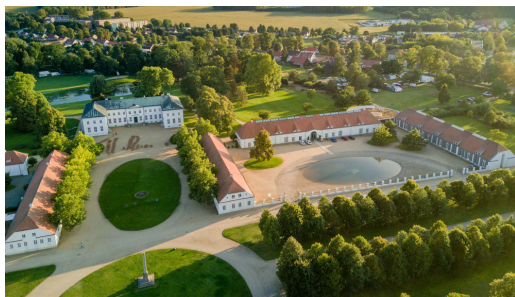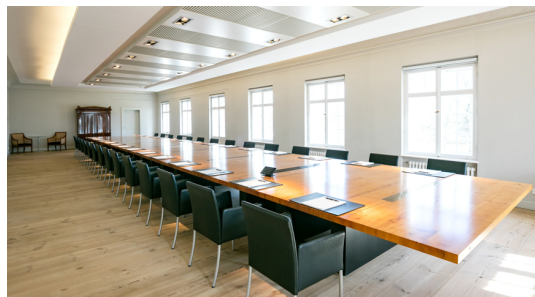

Schloss Neuhardenberg, Schinkelplatz 1-8, 15320 Neuhardenberg

# 1. Tag: Freitag, 03. März 2023

**13.00 Uhr**     **Come together**

**Chair: Johann Pratschke und Yüksel König**

*(Ort: Großer Saal, Schloss Neuhardenburg)*

**14:00 Uhr**     **Wie kann die chirurgische Weiterbildung flächendeckend gewährleistet werden**

Peter Bobbert, Berliner Ärztekammer

*(30 min Vortrag + 30 min Diskussion + Abstimmung über Thesen)*

**15:00 Uhr**     **Weiterbildungskooperation aus Sicht eines Maximalversorgers**

Rainer Kube, Carl-Thiem-Klinikum Cottbus

*(30 min Vortrag + 30 min Diskussion + Abstimmung über Thesen)*

**16:00 Uhr**     **Kaffeepause im Foyer Großer Saal**

**Chair: Ulrich Stöckle und Frank Marusch**

*(Ort: Großer Saal, Schloss Neuhardenburg)*

**16:30 Uhr**     **Weiterbildungskooperation aus Sicht eines Grundversorgers**

Stefan Lenz, Kreiskrankenhaus Prignitz

Stefan Farke, St. Marien-Krankenhaus Berlin

*(30 min Vortrag + 30 min Diskussion + Abstimmung über Thesen)*

**17:30 Uhr**     **Personalrekrutierung und Bindung vor dem Hintergrund des demographischen Wandels (Video)**

Carla Eysel, Charité - Universitätsmedizin Berlin

*(30 min Vortrag + 30 min Diskussion + Abstimmung über Thesen)*

**18:30 Uhr**     **Resümee Tag 1 + Diskussion**

Johann Pratschke und Ulrich Stöckle

**19:00 Uhr**     **Abendessen in der Großen Orangerie**

## 2. Tag: Samstag, 04. März 2023

### **Chair: Sascha Weiß und Eva Dobrindt**

*(Ort: Großer Saal, Schloss Neuhardenburg)*

#### **9:00 Uhr Talent-Akquisition und Mitarbeiter-Engagement – Denkanstöße**

Stefan Kürbis, Novanta

*(30 min Vortrag + 30 min Diskussion + Abstimmung über Thesen)*

#### **10:00 Uhr Frührekrutierungs- und Förderungskonzept für Studierende am CMSC**

Markus Scheibel, Schulthess-Klinik Zürich

*(15 min Vortrag + 15 min Diskussion + Abstimmung über Thesen)*

#### **10:30 Uhr Kaffeepause im Foyer Großer Saal**

### **Chair: Ulrich Adam und Sophie Strozyk**

*(Ort: Großer Saal, Schloss Neuhardenburg)*

#### **11:00 Uhr Moderne Ausbildungskonzepte**

Moritz Schmelzle, Medizinische Hochschule Hannover

*(30 min Vortrag + 30 min Diskussion + Abstimmung über Thesen)*

#### **12:00 Uhr Wo findet noch Weiterbildung statt? – Gründung von Weiterbildungsverbänden**

Johann Pratschke, Charité-Universitätsmedizin Berlin

*(15 min Vortrag + 15 min Diskussion + Abstimmung über Thesen)*

#### **12:30 Uhr Resümee Tag 2 + Diskussion**

Sascha Weiß und Ulrich Adam

#### **12:45 Uhr Verabschiedung und Feedback-Runde**

Johann Pratschke und Ulrich Adam

#### **13:00 Uhr Lunch**

## **Anhang 3 – Gesamtheit Statements und Abstimmungsergebnisse**

# Session I – Flächendeckende Weiterbildung

An welcher Art von Klinik sind/waren Sie aktiv ?

36 Antworten

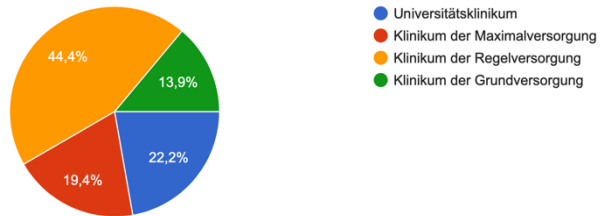

Durch eine Entbürokratisierung des ärztlichen Berufes, kann mehr Zeit für (neue) ärztliche Tätigkeit generiert werden.

36 Antworten

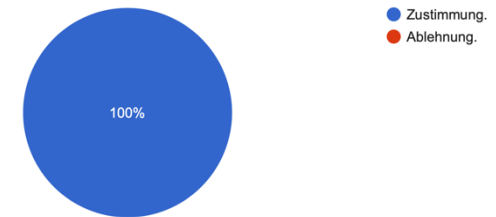

Es sollte ein fester Personalschlüssel (Ärzt:innen zu Patient:innen) für die unterschiedlichen Versorgungslevel definiert werden. Dieser Schlüssel soll nicht als Personal-Untergrenze fungieren.

36 Antworten

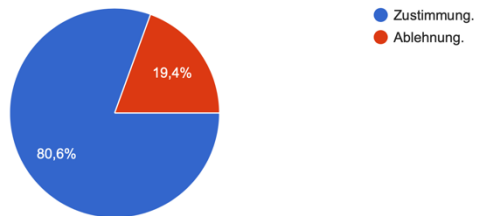

Ärztliche Personalkosten sollten in der Vorhaltepauschale der Gesundheitsreform beinhaltet sein.

36 Antworten

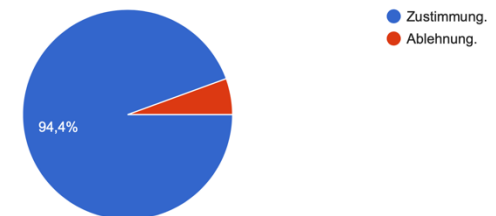



Es sollten vermehrt flexible Arbeitszeitmodelle in der Chirurgie ermöglicht werden und in der Weiterbildungsordnung berücksichtigt werden.

36 Antworten

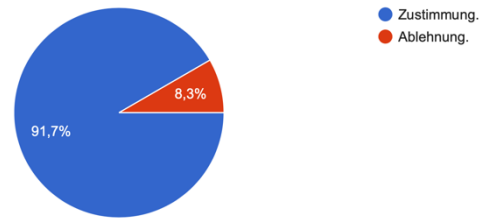

In der chirurgischen Weiterbildung sollte früher eine Wahl zwischen Spezialisierung oder Generalisierung ermöglicht werden.

36 Antworten

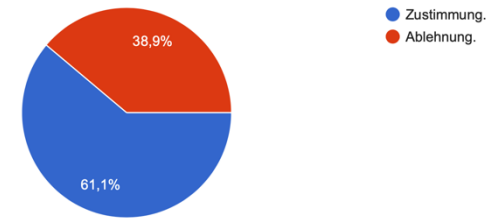

# Session II – Weiterbildungskooperationen und Personalrekrutierung

An welcher Art von Klinik sind/waren Sie aktiv ?  
37 Antworten

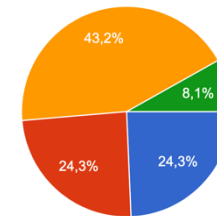

- Universitätsklinikum
- Klinikum der Maximalversorgung
- Klinikum der Regelversorgung
- Klinikum der Grundversorgung

Es sollte eine Integration von definierten externen Rotation in die chirurgische Weiterbildung erfolgen.  
37 Antworten

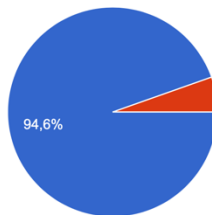

- Zustimmung.
- Ablehnung.

Es sollte eine Integration von Fellowships (Facharztniveau) in die chirurgische Weiterbildung erfolgen.  
37 Antworten

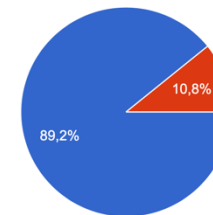

- Zustimmung.
- Ablehnung.

Die Eingriffszahlen in den Weiterbildungskatalogen der chirurgischen Disziplinen sollte reduziert werden.  
37 Antworten

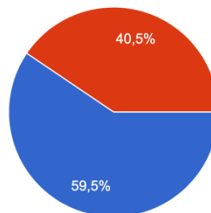

- Zustimmung.
- Ablehnung.

Die Assistenz durch die Weiterbildungsbefugten sollte in der chirurgischen Weiterbildung einen größeren Stellwert einnehmen.  
37 Antworten

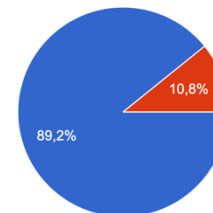

- Zustimmung.
- Ablehnung.

Es sollte strukturierte Integrationsprogramme für chirurgische Weiterbildungsassistent:innen geben.  
37 Antworten

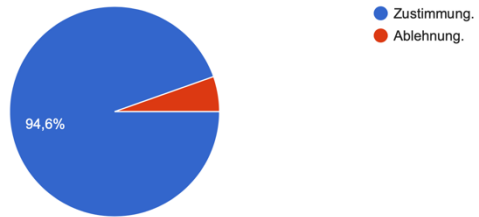

Es sollte differenzierte Weiterbildungsordnungen für für unterschiedliche Versorgungslevels geben.  
37 Antworten

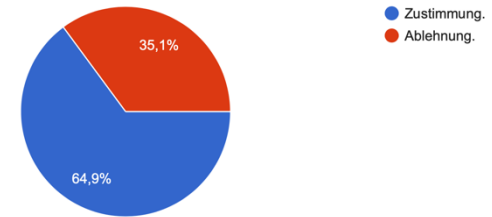

Es sollte kontinuierliches Prozesskostenanalysen und Personalcontrolling geben.  
37 Antworten

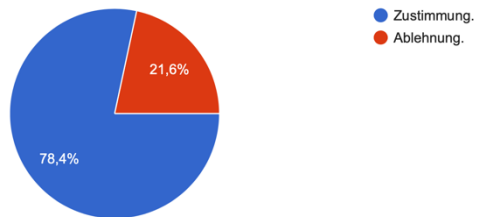

Es soll für Weiterbildungsbefugte ein professionelles Leadership-Training geben.  
37 Antworten

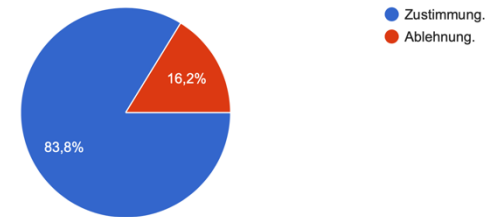

# Session III -Talent-Akquisition und Frührekrutierung

An welcher Art von Klinik sind/waren Sie aktiv ?  
30 Antworten

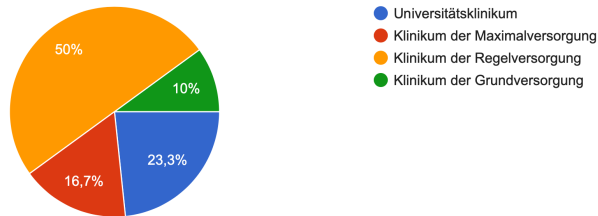

Mitarbeiter-Engagement sollte in der Chirurgie ein größerer Stellenwert eingeräumt werden.  
30 Antworten

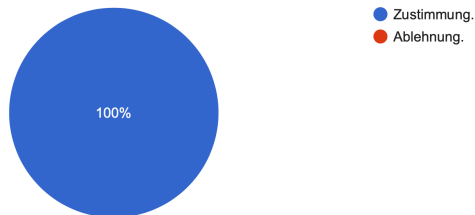

Mitarbeiter-Engagement ist in den chirurgischen Disziplinen umsetzbar.  
30 Antworten

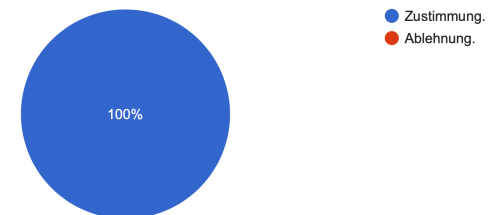

Eine Früh-Rekrutierung von Studierenden für die chirurgischen Disziplinen sollte strukturiert implementiert werden.  
30 Antworten

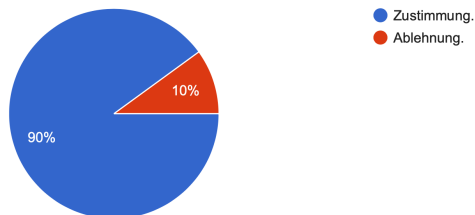

Auch nicht universitäre Chirurg:innen sollte sich in die Früh-Rekrutierung von Studierenden einbringen.  
30 Antworten

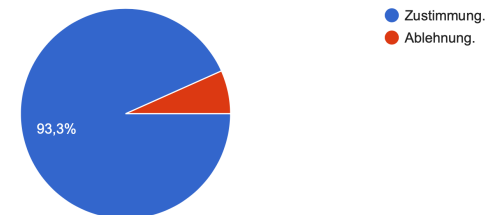

# Session IV – moderne Weiterbildungskonzepte und Weiterbildungsverbände

An welcher Art von Klinik sind/waren Sie aktiv ?  
26 Antworten

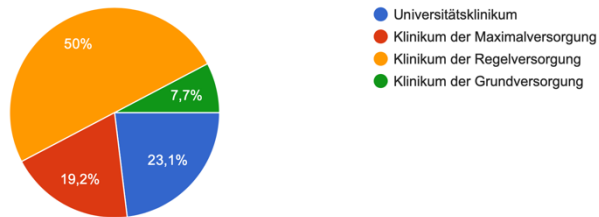

Die Wirtschaftlichkeit steht im Widerspruch zur chirurgischen Weiterbildung.  
26 Antworten

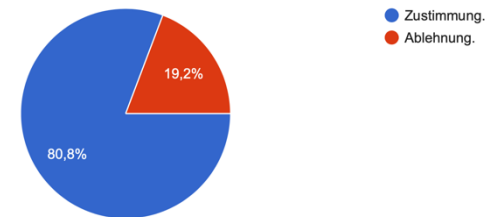

In der Weiterbildung sollte berücksichtigt werden, dass die Qualität der Patientenversorgung oberste Priorität hat, und sich dieser einordnet.  
26 Antworten

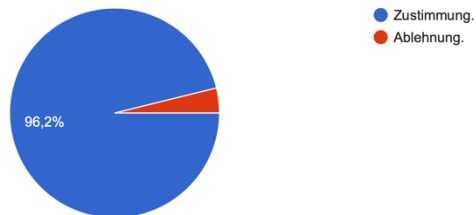

Weiterbildungsverbände sind ein geeignetes Tool um flächendeckend qualitativ hochwertig Weiterbildung anzubieten.  
26 Antworten

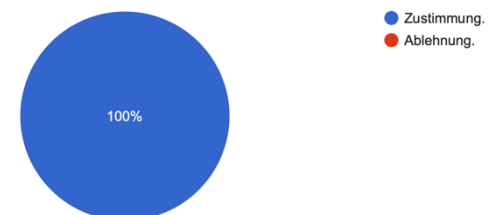

Die BCG wird sich dafür einsetzen diese Weiterbildungsverbände zu implementieren.

26 Antworten

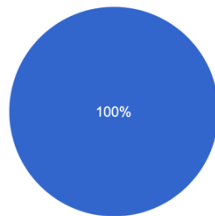

● Zustimmung.  
● Ablehnung.

Die BCG soll eine Projektgruppe für die Einrichtung von Weiterbildungsverbänden ins Leben rufen.

26 Antworten

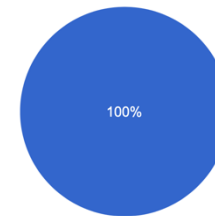

● Zustimmung.  
● Ablehnung.

Die BCG sollte sich dafür einsetzen, dass technisch/organisatorische Plattformen in Rahmen von Kooperationsverbänden etabliert werden.

26 Antworten

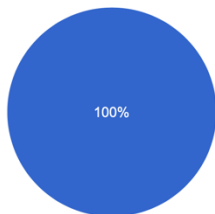

● Zustimmung.  
● Ablehnung.

Die Rahmenbedingungen für die Weiterbildungsverbände sollen gemeinsam zwischen der BCG und der Berliner/Brandenburger Ärztekammer definiert werden.

26 Antworten

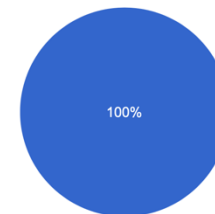

● Zustimmung.  
● Ablehnung.

Die Neuhardenberger Gespräche sollten auch in Zukunft genutzt werden um wegweisende Themen der Chirurgie zu diskutieren.

26 Antworten

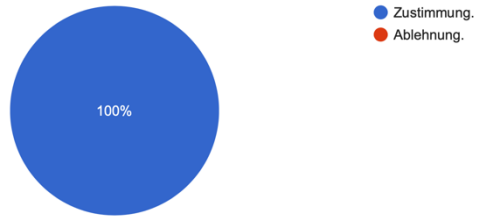

Die Neuhardenberger Gespräche sollten in folgenden Abständen stattfinden.

26 Antworten

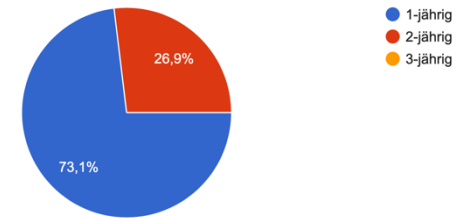

Supplement: MOESM1 [file 27011470]
